# Supplementary material for: Reactions of aquatitanium(ii) with hypervalent chromium species
Source: Royal Society of Chemistry journal article supplement (doi:10.1039/b815582h), 2008-12-09
Supplement: b815582h.pdf [file b815582h.pdf]

ELECTRONIC SUPPLEMENTARY MATERIAL

**Reactions of aquatitanium(II) with hypervalent chromium  
species**

Basab Bijayi Dhar\*, Ritam Mukherjee and Edwin S. Gould\*

Tables S1 to S5. Detailed kinetic data for redox reactions.

Fig S1. Kinetic Profile for the reaction of chromium(IV) with titanium(II) in solutions buffered by 2-ethyl-2-hydroxybutanoate(Lig<sup>-</sup>).

Fig S2.  $k_{1(\text{obs})}/[\text{Ti(II)}]$  vs.  $[\text{Ti(IV)}]$  for  $\text{Cr}^{\text{VI}} \longrightarrow \text{Cr}^{\text{V}}$  according to Table S4.

Table S1. Reduction of chromium(IV) by titanium(II) in solutions buffered by 2-ethyl-2-Hydroxybutanoate (Lig<sup>-</sup>). Kinetic data.<sup>a</sup>

| [Ti(II)]/ mM | [Ti(IV)]/ mM | 10 <sup>-2</sup> k <sub>obs</sub> , s <sup>-1</sup> <sup>b</sup> |
|--------------|--------------|------------------------------------------------------------------|
| 0.25         | 0.25         | 1.43 (1.41)                                                      |
| 0.50         | 0.50         | 2.8 (2.8)                                                        |
| 0.60         | 0.60         | 3.4 (3.4)                                                        |
| 0.75         | 0.75         | 4.1 (4.2)                                                        |

<sup>a</sup>Reactions were run at 22.0 ± 0.5 °C; [HLig] + [Lig<sup>-</sup>] = 0.28 M, [Cr(IV)] = 5.0 × 10<sup>-5</sup> M, μ = 0.50 M (NaClO<sub>4</sub> + Lig<sup>-</sup>), pH = 3.08, λ = 510 nm.

<sup>b</sup>Pseudo-first order rate constants; parenthetical values were calculated using rate law:

$$k_{\text{obs}} = [\text{Ti}^{\text{II}}](5.5 \times 10^5 \text{ M}^{-1}\text{s}^{-1}).$$

Table S2. Reduction of chromium(V) by titanium(II) in solutions buffered by 2-ethyl-2-hydroxybutanoate (Lig<sup>-</sup>). Kinetic data.<sup>a</sup>

| [Ti(II)]/mM | [Ti(IV)]/mM | $k_{\text{obs}}$ , s <sup>-1</sup> <sup>b</sup> |
|-------------|-------------|-------------------------------------------------|
| 0.50        | 0.50        | 26(26)                                          |
| 0.70        | 0.70        | 36(36)                                          |
| 1.00        | 1.00        | 52(51)                                          |
| 1.50        | 1.50        | 75(77)                                          |
| 0.50        | 1.00        | 25(26)                                          |
| 0.50        | 1.50        | 26(26)                                          |

<sup>a</sup>Reactions at 22.0 ± 0.5 °C; [Cr<sup>V</sup>] = 5.0 × 10<sup>-5</sup> M; [HLig] + [Lig<sup>-</sup>] = 0.28 M; μ = 0.50 M (NaClO<sub>4</sub> + Lig<sup>-</sup>); λ = 510 nm; pH = 3.1.

<sup>b</sup>Pseudo-first order rate constants; parenthetical values were calculated as  $k_{\text{obs}} = [\text{Ti}^{\text{II}}]$  (5.1 × 10<sup>4</sup> M<sup>-1</sup>s<sup>-1</sup>).

Table S3. Reduction of Cr(VI) by Ti(II) in the absence of ligands stabilizing Cr(V) and Cr(IV). Kinetic data<sup>a</sup>

| [Ti(II)], mM | [Ti(IV)], mM | [H <sup>+</sup> ], M | $k_{\text{obs}}$ , s <sup>-1</sup> <sup>b</sup> | $k_{\text{obs}}$ , s <sup>-1</sup> <sup>c</sup> |
|--------------|--------------|----------------------|-------------------------------------------------|-------------------------------------------------|
| 1.00         | 1.00         | 0.50                 | 11.2(11.3)                                      | 9.0(9.8)                                        |
| 1.50         | 1.50         | 0.50                 | 17.1(17.0)                                      | 14.6(14.8)                                      |
| 2.0          | 2.0          | 0.50                 | 23(23)                                          | 19.6(19.7)                                      |
| 3.0          | 3.0          | 0.50                 | 34(34)                                          | 32(29)                                          |
| 5.0          | 5.0          | 0.50                 | 57(57)                                          | 51(49)                                          |
| 1.00         | 5.0          | 0.50                 | 11.4(11.3)                                      | 9.6(9.8)                                        |
| 1.00         | 10.0         | 0.50                 | 11.1(11.3)                                      | 9.2(9.8)                                        |
| 1.00         | 1.00         | 0.35                 | 8.6(8.6)                                        | 8.2(8.1)                                        |
| 1.00         | 1.00         | 0.25                 | 6.8(6.8)                                        | 7.2(6.9)                                        |
| 1.00         | 1.00         | 0.100                | 4.1(4.1)                                        | 5.1(5.2)                                        |
| 1.00         | 1.00         | 0.050                | 3.2(3.2)                                        | 4.6(4.6)                                        |

<sup>a</sup>Reactions at  $22.0 \pm 0.5$  °C,  $\mu = 0.50$  M,  $\lambda = 350$  nm;  $[\text{Cr}^{\text{VI}}] = 5 \times 10^{-5}$  M. All curves were exponential.

<sup>b</sup>Pseudo-first order rate constants in perchlorate media. Parenthetical values were calculated using rate law  $k_{\text{obs}} = (k_0 + k_{\text{H}}[\text{H}^+])[\text{Ti}^{\text{II}}]$ , where  $k_0 = (23 \pm 1) \times 10^2 \text{ M}^{-1}\text{s}^{-1}$  and  $k_{\text{H}} = (18 \pm 1) \times 10^3 \text{ M}^{-2}\text{s}^{-1}$ .

<sup>c</sup>Pseudo-first order rate constants in triflate media. Parenthetical values were calculated using rate law above, where  $k_o = (41 \pm 1) \times 10^2 \text{ M}^{-1}\text{s}^{-1}$  and  $k_H = (11.6 \pm 0.6) \times 10^3 \text{ M}^{-2}\text{s}^{-1}$ .

Table S4. Biphasic reaction of Cr(VI) and Ti(II) in ligating buffer (Lig<sup>-</sup>) which stabilizes Cr(V)<sup>a</sup> Rise and fall profile showing generation and decay of Cr(V)-ligand complex.

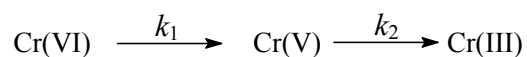

| [Ti <sup>II</sup> ]/ mM | [Ti <sup>IV</sup> ]/ mM | ( <i>k</i> <sub>1</sub> ) <sub>obs</sub> , s <sup>-1</sup> <sup>b</sup> | ( <i>k</i> <sub>2</sub> ) <sub>obs</sub> , s <sup>-1</sup> <sup>c</sup> |
|-------------------------|-------------------------|-------------------------------------------------------------------------|-------------------------------------------------------------------------|
| 0.50                    | 0.50                    | 6.4 (6.4)                                                               | 32 (29)                                                                 |
| 0.80                    | 0.80                    | 15.8 (15.8)                                                             | 48 (47)                                                                 |
| 1.00                    | 1.00                    | 24 (23)                                                                 | 59 (58)                                                                 |
| 1.50                    | 1.50                    | 50 (49)                                                                 | 80 (87)                                                                 |
| 2.0                     | 2.0                     | 83 (83)                                                                 | 109 (116)                                                               |
| 2.5                     | 2.5                     | 121 (122)                                                               | 139 (145)                                                               |
| 0.50                    | 1.00                    | 12.0 (11.9)                                                             | 29 (29)                                                                 |
| 0.50                    | 1.50                    | 17.1 (16.8)                                                             | 31 (29)                                                                 |
| 0.50                    | 2.0                     | 21 (21)                                                                 | 30 (29)                                                                 |
| 0.50                    | 2.5                     | 24 (24)                                                                 | 30 (29)                                                                 |
| 0.50                    | 3.0                     | 28 (28)                                                                 | 29 (29)                                                                 |
| 0.50                    | 3.5                     | 31 (30)                                                                 | 29 (29)                                                                 |
| 0.50                    | 4.0                     | 34 (33)                                                                 | 29 (29)                                                                 |
| 0.50                    | 5.0                     | 37 (37)                                                                 | 30 (29)                                                                 |
| 0.50                    | 6.0                     | 39 (41)                                                                 | 28 (29)                                                                 |

<sup>a</sup>Reactions were carried out at  $22.0 \pm 0.5$  °C;  $[\text{HLig}] + [\text{Lig}^-] = 0.285$  M;  $\mu = 0.50$  M ( $\text{NaClO}_4 + \text{Lig}^-$ ); pH 3.08;  $\lambda = 510$  nm;  $[\text{Cr}^{\text{VI}}] = 0.05 - 0.20$  mM. Contributing rate constants were calculated as described by Bose (ref. 18a).

<sup>b</sup>Parenthetical values were calculated using rate law (5) and parameters in text.

<sup>c</sup>Parenthetical values were calculated as  $k_2 = [\text{Ti}^{\text{II}}](5.9 \times 10^4 \text{ M}^{-1} \text{ s}^{-1})$ .

Table S5. Reductions of Cr(VI) and Cr(IV) by Ti(III). Kinetic data.<sup>a</sup>

| Oxidant             | [Ti(III)]/ mM | $k_{\text{obs}}, \text{s}^{-1}$ |
|---------------------|---------------|---------------------------------|
| Cr(VI) <sup>b</sup> | 1.00          | 4.3 (4.1) <sup>d</sup>          |
|                     | 3.00          | 13.0 (12.3) <sup>d</sup>        |
|                     | 5.00          | 19.3 (20.0) <sup>d</sup>        |
|                     | 8.00          | 32 (33) <sup>d</sup>            |
| Cr(IV) <sup>c</sup> | 0.60          | 80 (78) <sup>e</sup>            |
|                     | 0.80          | 106 (104) <sup>e</sup>          |
|                     | 1.00          | 128 (130)                       |
|                     | 1.20          | 150 (156) <sup>e</sup>          |

<sup>a</sup>Reactions at  $22.0 \pm 0.5$  °C. All curves were exponential.

<sup>b</sup> $\mu = 0.50$  M (HCl/HClO<sub>4</sub>);  $\lambda = 350$  nm,  $[\text{Cr}^{\text{VI}}] = 1.0 \times 10^{-4}$  M; no 2-methyl-2-hydroxybutanoate(Lig<sup>-</sup>) added.

<sup>c</sup>pH 3.50,  $[\text{HLig}] + [\text{Lig}^-] = 0.010$  M;  $\mu = 0.10$  M (LiCl)  $\lambda = 510$  nm;  $[\text{Cr}^{\text{IV}}] = 1.0 \times 10^{-4}$  M.

<sup>d</sup>Pseudo-first order rate constants; parenthetical values were calculated using rate law:

$$k_{\text{obs}} = [\text{Ti}^{\text{III}}](4.1 \times 10^3 \text{ M}^{-1}\text{s}^{-1}).$$

<sup>e</sup>Pseudo-first order rate constants; parenthetical values were calculated using rate law:

$$k_{\text{obs}} = [\text{Ti}^{\text{III}}](1.3 \times 10^4 \text{ M}^{-1}\text{s}^{-1}).$$



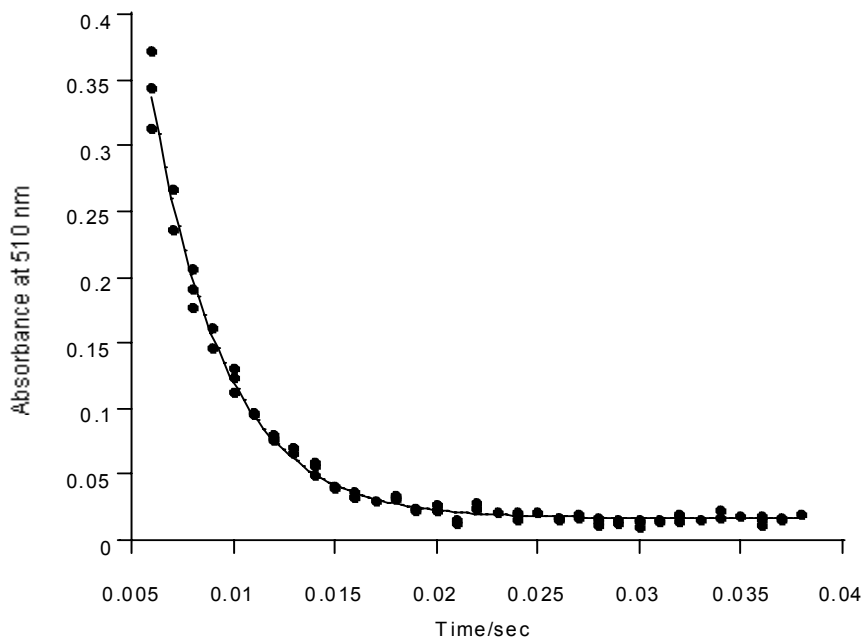

**Fig. S1.** Kinetic profile at 510 nm for the reaction of chromium(IV) ( $5.0 \times 10^{-5}$  M) with titanium(II) ( $5.0 \times 10^{-4}$  M) in solutions buffered by 2-ethyl-2-hydroxybutanoate(Lig<sup>-</sup>) at  $22.0 \pm 0.5$  °C. The pH was 3.08. [HLig] + [Lig<sup>-</sup>] = 0.28 M,  $\mu$  = 0.50 M (NaClO<sub>4</sub> + Lig<sup>-</sup>). Small circles denote experimental data; the solid line was calculated using first order rate law:  $A_t = A \exp^{-kt} + A_\infty$  where  $A_t$ ,  $A$ ,  $A_\infty$  and  $k$  represent absorbance at time  $t$ , total absorbance change, final absorbance and rate constant respectively.

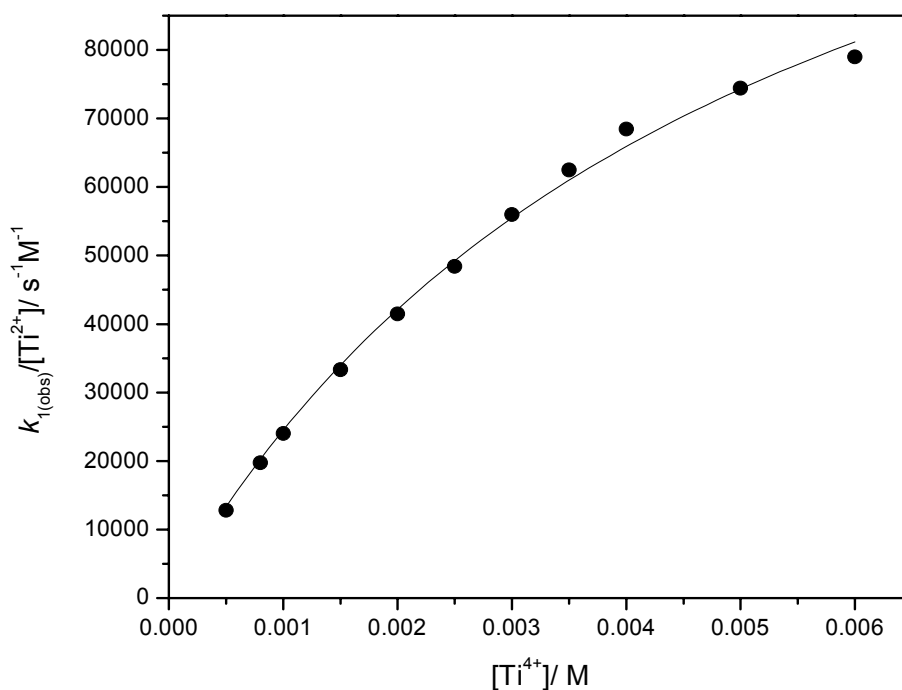

**Fig. S2.**  $k_{1(\text{obs})}/[\text{Ti}(\text{II})]$  vs.  $[\text{Ti}(\text{IV})]$  for  $\text{Cr}^{\text{VI}} \longrightarrow \text{Cr}^{\text{V}}$  according to table S-4.  $[\text{Ti}(\text{II})] = (0.50 - 2.5) \text{ mM}$ ;  $[\text{Ti}(\text{IV})] = (0.50 - 6.0) \text{ mM}$ . All the reactions were carried out at  $22.0 \pm 0.5 \text{ }^\circ\text{C}$ ;  $[\text{HLig}] + [\text{Lig}^-] = 0.285 \text{ M}$ ;  $\mu = 0.50 \text{ M}$  ( $\text{NaClO}_4 + \text{Lig}^-$ );  $\text{pH } 3.08$ ;  $\lambda = 510 \text{ nm}$ ;  $[\text{Cr}^{\text{VI}}] = (0.05 - 0.20) \text{ mM}$ . Solid line represents calculated values using the equation:  $k_{1(\text{obs})}/[\text{Ti}^{2+}] = k_{\text{cat}}K[\text{Ti}^{\text{IV}}]/(1+K[\text{Ti}^{\text{IV}}])$  taking  $k_{\text{cat}} = (15.8 \pm 0.7) \times 10^4 \text{ M}^{-1}\text{s}^{-1}$  and  $K = (1.8 \pm 0.1) \times 10^2 \text{ M}^{-1}$ .
